# Supplementary material for: Uveal Melanoma Zebrafish Xenograft Models Illustrate the Mutation Status-Dependent Effect of Compound Synergism or Antagonism
Source: PubMed Central journal article supplement — Invest Ophthalmol Vis Sci. 2024 Aug 20;65(10):26. doi: 10.1167/iovs.65.10.26 (PMC11346061; doi:10.1167/iovs.65.10.26), 2024-08-20
Supplement: iovs-65-10-26_s001.pdf [file iovs-65-10-26_s001.pdf]

**Supplementary material belonging to the manuscript:**

**Uveal Melanoma zebrafish xenograft models illustrate the mutation status dependent-effect of compound synergism or antagonism**

Quincy C. C. van den Bosch<sup>1,2</sup>, Emine Kilic<sup>1 ‡</sup>, Erwin Brosens<sup>2 \* †</sup>

<sup>1</sup>Department of Ophthalmology and <sup>2</sup>Clinical Genetics Erasmus MC Cancer Institute, Erasmus MC, Rotterdam, The Netherlands, ‡contributed equally, \*corresponding author

*Corresponding author: Erwin Brosens, e.brosens@erasmusmc.nl*

**Contents:**

**Supplementary table 1: Copy number variations and mutation status of cell lines used in this manuscript.**

**Supplementary figure 1: Single nucleotide polymorphism array of dermal melanocytes.**

**Supplementary figure 2: Overview of tumor volume and detected disseminated cells per inoculation site for each cell line**

**Supplementary figure 3: Toxicity screen on zebrafish larvae**

**Supplementary methods: Scripts to quantify zebrafish xenografts.**

*Copy number variations and mutation status of cell lines used in this manuscript.*

| Cell line   | Origin              | Driver Mutation          | Secondary Mutation       | Chr. 3           | Chr. 6              | Chr. 8              | BAP1 protein | Ref          | RRID      |
|-------------|---------------------|--------------------------|--------------------------|------------------|---------------------|---------------------|--------------|--------------|-----------|
| GM2180<br>7 | Infant<br>Skin      | -                        | -                        | Disomy 3         | Disomy 6            | Disomy 8            | -            | -            | CVCL_H988 |
| CRL405<br>9 | Adult Skin          | -                        | -                        | Disomy 3         | Disomy 6            | Disomy 8            | -            | -            | N/A       |
| 92.1        | Primary             | GNAQ Q209L<br>c.626A>T   | EIF1AX<br>c. 17G/A       | Disomy 3         | Gain 6p             | Gain 8q             | Yes          | <sup>1</sup> | CVCL_8607 |
| Mel202      | Primary             | GNAQ Q209L<br>c.626A>T   | SF3B1<br>c.1793 C>T      | Disomy 3         | Gain 6p,<br>Loss 6q | Gain 8q             | Yes          | <sup>1</sup> | CVCL_C301 |
| MP38        | Primary             | GNAQ Q209L<br>c.626A>T   | BAP1<br>c.68-<br>9_72del | Monosomy 3       | Gain 6p,<br>Loss 6q | Gain 8q,<br>Loss 8p | No           | <sup>2</sup> | CVCL_4D11 |
| MP46        | Primary             | GNAQ Q209L<br>c.626A>T   | WT                       | Disomy 3,<br>LOH | Gain 6p,<br>Loss 6q | Gain 8q,<br>Loss 8p | No           | <sup>2</sup> | CVCL_4D13 |
| MM28        | Liver<br>Metastasis | GNA11 Q209L<br>c.626 A>T | BAP1<br>c.1881 C>A       | Loss 3q          | Gain 6p,<br>Loss 6q | Gain 8q,<br>Loss 8p | No           | <sup>2</sup> | CVCL_4D15 |

*Supplementary Table 1: Overview of molecular status of the used cell lines in this manuscript.*

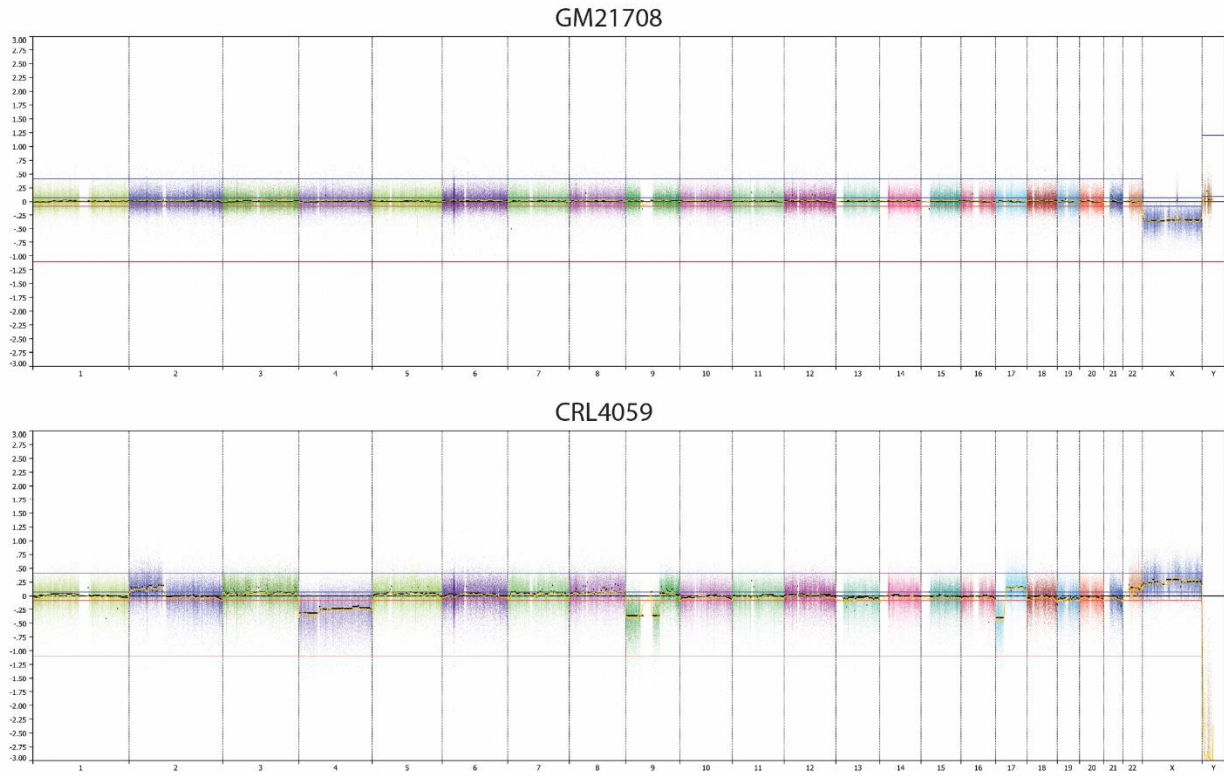

**Supplementary Figure 1:** *Single nucleotide polymorphism array of dermal melanocytes*

Neonatal melanocytes (GM21708) illustrate a normal chromosomal pattern; whereas hTERT-dermal melanocytes (CRL4059) demonstrate chromosomal aberration in chr.2, chr. 4, chr. 9 and chr.17

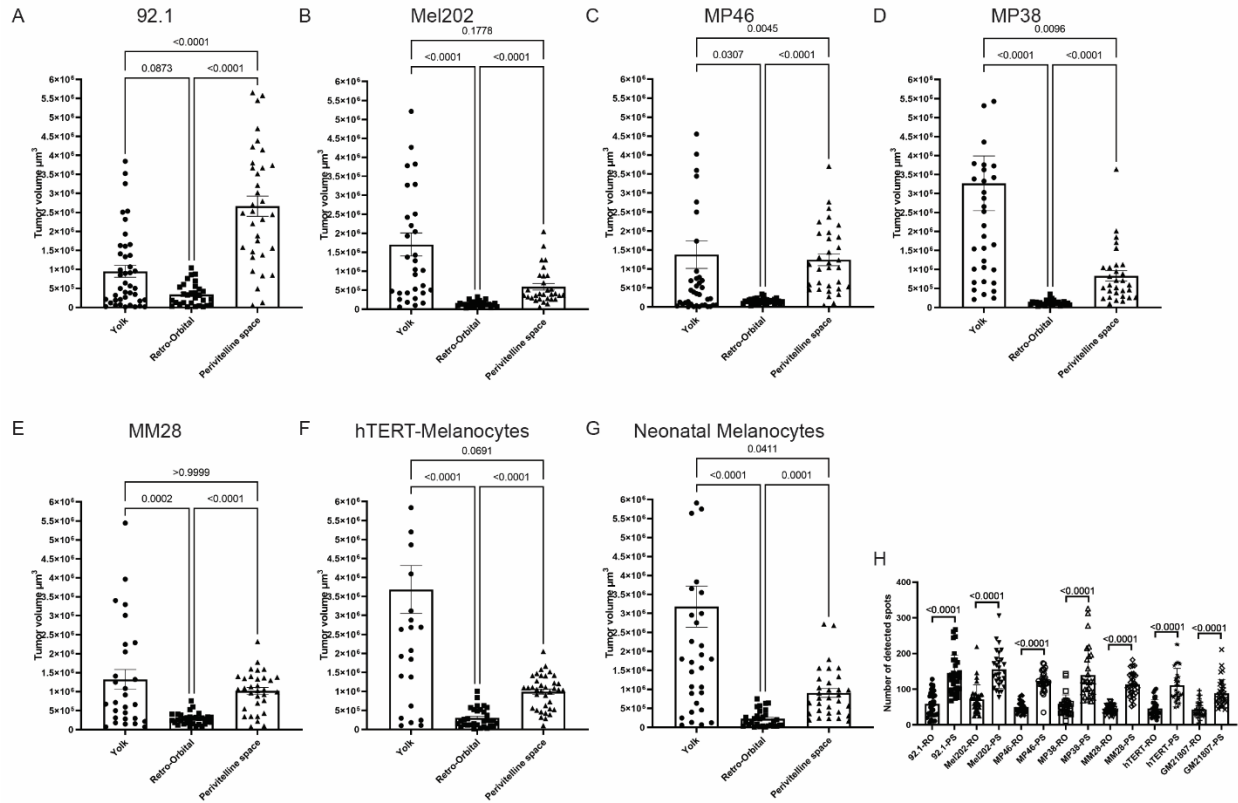

**Supplementary Figure 2: Overview of tumor volume and detected disseminated cells per inoculation site for each cell line**

Comparison of tumor volumes between yolk sac, retro-orbital and perivittline space injections illustrated the differences between injection site (A-G). H) comparison of the detected number of spots between retro-orbital and perivittline space inoculations.

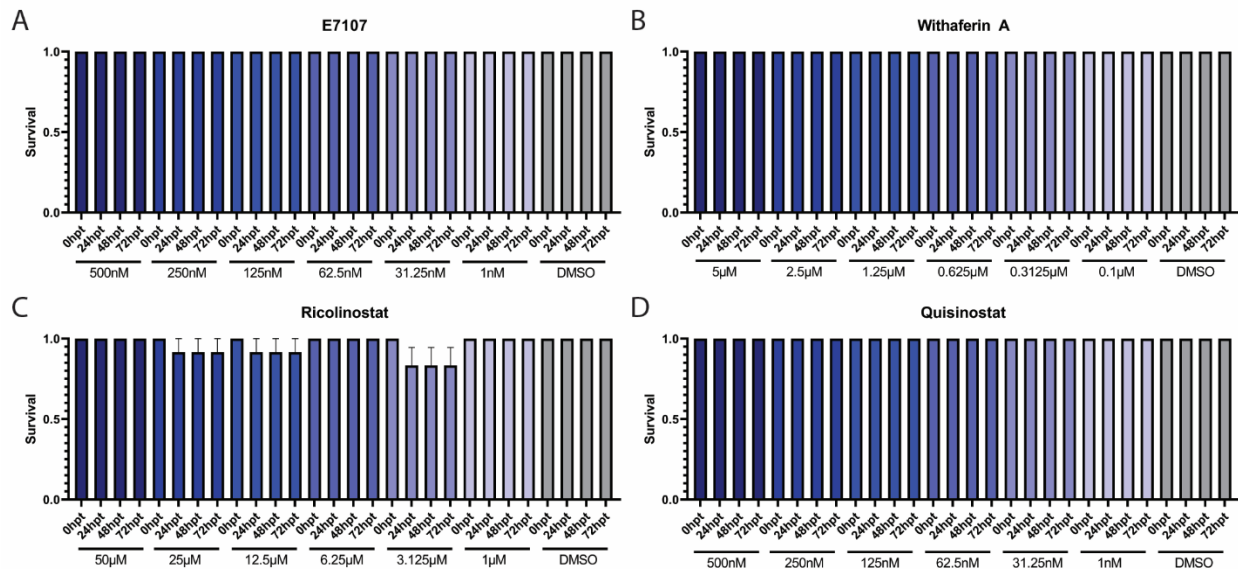

**Supplementary Figure 3: Toxicity tolerance of zebrafish larvae**

Each compound was evaluated for toxicity based on the effective concentrations found by in vitro screenings of UM cell lines.

**Supplementary Methods: Scripts to quantify zebrafish xenografts.**

**Script to quantify tumor volume (Can be copy and pasted into the macro-manager of FIJI)**

//splits all channels.

run("Split Channels");

//Closes brightfield image. Adjust 'C2-\*' to whatever channel you want to remove from analysis

close('C2-\*');

//transform image to get the right orientation. This might differ depending on how the zebrafish is positioned under the microscope.

run("Rotate 90 Degrees Right")

//measure tumor spots in cubic micron.

run("3D Objects Counter", "threshold=90 slice=1 min.=10 max.=10000000 exclude\_on\_edges surfaces\_numbered statistics");

//Saves measurements in text file.

saveAs("text");

```
//Closes analysed image.
```

```
close("C1-*");
```

```
//Closes measurements.
```

```
close("*.txt");
```

**Script to quantify number of disseminated cells and their migration distance (*Can be copy and pasted into the macro-manager of FIJI*)**

```
// Splits all channels
```

```
run("Split Channels");
```

```
// Close channel 2
```

```
close("C2*");
```

```
// Rotate image 90 degrees to the right. This might differ depending on how the zebrafish is positioned under the microscope.
```

```
run("Rotate 90 Degrees Right");
```

```
// Max-intensity Z projection without keeping the stack
```

```
run("Z Project...", "projection=[Max Intensity]");
```

```
zProjID = getImageID();
```

```
saveAs("Tiff", "zProj.tif");
```

```
// Threshold image and obtain mask.
```

```
setThreshold(90, 255);
```

```
run("Create Mask");
```

```
maskID = getImageID();
```

```
saveAs("Tiff", "mask.tif");
```

```
// Multiply z-projected image with mask using image calculator to obtain binary thresholded image.
```

```
imageCalculator("Multiply", "zProj.tif", "mask.tif");
```

```
//Selects image which will be analysed.
```

```
selectImage("zProj.tif");
```

```

//Identify x and y coordinates of injection spot
waitForUser("Hover over the reference point and remember the coordinates.");

// Manually enter the x and y coordinates of the reference point
xRef = getNumber("Enter x-coordinate of the reference point:", 0);
yRef = getNumber("Enter y-coordinate of the reference point:", 0);

// Set parameters for spot detection.
minSize = 20; // minimum spot size in pixels
maxSize = 5000; // maximum spot size in pixels
threshold = 20; // detection threshold

// Find spots using the Find Maxima function
run("Find Maxima...", "noise=" + threshold + " output=[Point Selection] exclude");

// Filter spots by size
run("Analyze Particles...", "size=" + minSize + "-" + maxSize + " circularity=0.00-1.00 show=Masks add");

// Get the number of spots and their x and y coordinates
nSpots = nResults();

for (i = 0; i < nSpots; i++) {
    x = getResult("X", i);
    y = getResult("Y", i);

// Calculate the distance between the spot and the reference point
    distance = sqrt(pow(x - xRef, 2) + pow(y - yRef, 2)); // convert distance to microns

// Write the spot's x and y coordinates and the distance to the reference point to the output file
    print("Spot #" + (i+1) + ": X = " + x + ", Y = " + y + ", Distance to reference point = " + distance + "
microns\n");
}

//Selects the measurements window
selectWindow("Log");

//Saves measurements as text file.
saveAs("Text");

```

//String of commands to close and reset all parameters and images used to obtain measurements without closing stacks that are still to be analyzed.

```
print("\\Clear");
```

```
run("Clear Results");
```

```
roiManager("Reset");
```

```
run("Close");
```

```
close("C*");
```

```
close("zProj.tif");
```

```
close("mask.tif");
```

```
close("Mask of zProj.tif");
```

## References

1. Jager MJ, Magner JA, Ksander BR, Dubovy SR. Uveal Melanoma Cell Lines: Where do they come from? (An American Ophthalmological Society Thesis). *Trans Am Ophthalmol Soc* 2016;114:T5.
2. Amirouchene-Angelozzi N, Nemati F, Gentien D, et al. Establishment of novel cell lines recapitulating the genetic landscape of uveal melanoma and preclinical validation of mTOR as a therapeutic target. *Mol Oncol* 2014;8:1508-1520.
